# Supplementary material for: Helicase binding to DnaI exposes a cryptic DNA-binding site during helicase loading in Bacillus subtilis
Source: PubMed Central journal article supplement — Nucleic Acids Res. 2006 Sep 26;34(18):5247–58. doi: 10.1093/nar/gkl690 (PMC1636449; doi:10.1093/nar/gkl690), 2006-09-26

**Suppl. Fig. 1s**

The oligonucleotides used in this study. The mutations are indicated by bold underlined letters.

**Suppl. Fig. 2s**

PAR (100  $\mu\text{M}$ ) was added to a DnaI solution (10  $\mu\text{M}$ ) and different aliquots of the DnaI/PAR mixture were then prepared in the presence of increasing concentrations (0.1–1.6 mM) of *p*-chloromercuribenzoic acid. The absorbance at 500 nm ( $A_{500}$ ) was measured for all the aliquots. The  $\text{Zn}^{2+}$  ions released from DnaI by PAR were coordinated by PMBA and the resulting PMBA-  $\text{Zn}^{2+}$  complex absorbed light 500 nm manifested by an increase of  $A_{500}$  (left graph). Finally, increasing concentrations of EDTA were added in the aliquot with the highest concentration of PMBA (highest  $A_{500}$ ) and the  $A_{500}$  was monitored (right graph). Gradual decrease in  $A_{500}$  indicated the extraction of the metal from the PMBA-  $\text{Zn}^{2+}$  complex by EDTA.

**Suppl. Fig. 3s**

CD spectra of all mutant proteins (5  $\mu\text{M}$ ) compared to wtDnaI, as indicated. All mutant proteins produced spectra comparable to the wtDnaI indicating proper overall folding.

**Suppl. Fig. 4s**

Comparison of the ATPase activities of wtDnaI and K174A. The top panel shows a TLC plate with the reaction products from a time course in the presence of 16.7 nM [ $\gamma$ - $^{32}\text{P}$ ATP] and 8  $\mu\text{M}$  of either wt DnaI (left) or K174A (right), as indicated. The % hydrolysis was calculated and the comparative graphs are shown in the bottom panel. Lane C indicates a negative control, ATP without any proteins and incubated for 90 min in the same buffer. The activity of the K174A mutant is significantly reduced compared to wtDnaI.

**Suppl. Fig. 5s**

DnaI exhibits single turnover ATPase activity.

TLC-based ATPase assays at constant ATP concentration (50  $\mu\text{M}$ ) and varying DnaI concentrations (0.1, 1, 5, 10, 25 and 50  $\mu\text{M}$ ; bars 1-6, respectively). All reactions were carried out as described in the 'Materials and Methods' section using 100  $\mu\text{M}$  ATP supplemented with 16.65 nM  $\gamma\text{-}^{32}\text{P}\text{-ATP}$  for 2 hours at 37°C. The white bars indicate the concentration of DnaI and the grey bars the concentration of the hydrolysed ATP. All reactions were carried out in triplicate and error bars are indicated. A representative TLC plate from these reactions is also shown; lane C indicates a control reaction in the absence of DnaI.

The data indicate that at 0.1  $\mu\text{M}$  DnaI, 0.1  $\mu\text{M}$  ATP is hydrolysed but as the DnaI concentration is increased to 1, 5, 10, 25 and 50  $\mu\text{M}$  the ATP hydrolysed is 0.7, 2.9, 3.9, 8.8 and 14.4  $\mu\text{M}$ , respectively.

Mutagenesis:

C67AF 5'-CAAAGCAAGAAGCCTTCCTATTGTTCGGAA-3'

C67AR 5'-TTCCGAACAATAGGAGGGCATTCTTGCTTTG-3'

C70AF 5'-AATTGCTCCTATGCTTTCGGAAGATGA-3'

C70AR 5'-TCATCTTCCGAAGCATAGGAGCAATT-3'

C76AF 5'-GAAGATGAAAACGCCAACAATTTGTTG-3'

C76AR 5'-CAACAAATTGTTGGCGTTTTTCATCTTC-3'

H84AF 5'-TTGGAGGGCTACGCTCCGAAGCT-3'

H84AR 5'-AGCTTCAAAGCGTAGCCCTCCAA-3'

C101AF 5'-GAGTATTACGAAGGCTCCAGTCAAACGG-3'

C101AR 5'-CCGTTTGACTGGAGCTTTCGTAATACTC-3'

K174AF 5'-TTTGGGGTAGGAGGCGACGTTTATGCTCGCT-3'

K174AR 5'-AGCGAGCATAAACGTCGCTCCTACCCCAA-3'

Gel shifts:

5'-GTCGGATCCTCTAGACAGCTCCATGATCACTGGCAC  
TGGTAGAATTCGGC-3'

5'-GCCGAATTCTACCAGTGCCAGTGATGGACATCTTT  
GCCACGTTGACCCA-3'

TLC assays:

5'-TGCATGCCTGCAGGTCGACTCTAGAGGATCCCC-3'

**A<sub>500</sub>**  
**(mAbs)**

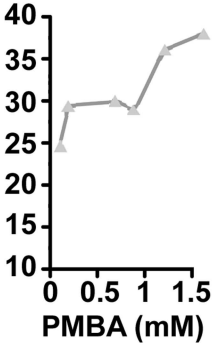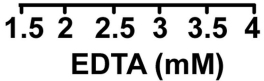

## CD spectra

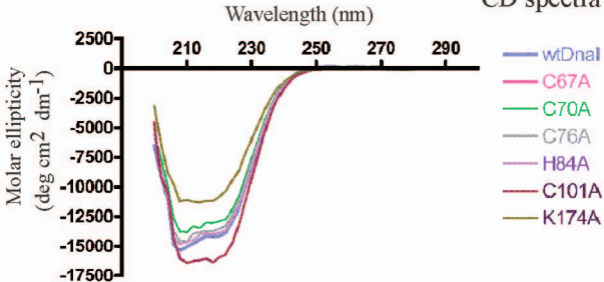

C    1    5    10    20    40    60    90    Time (min)

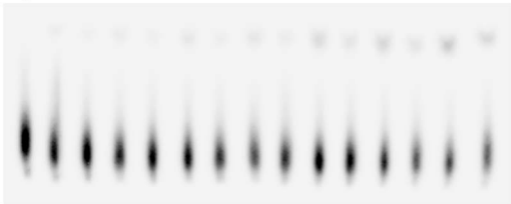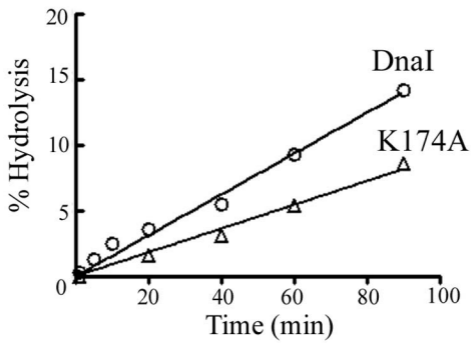

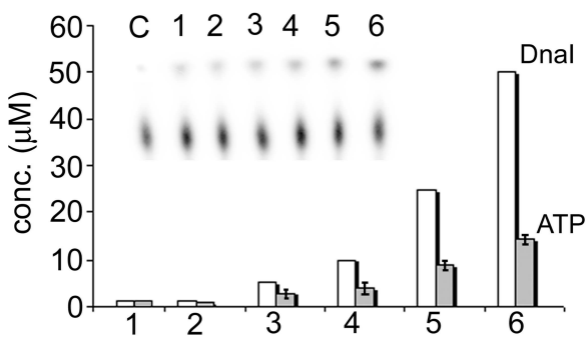

Supplement: nar_gkl690_1.pdf [file nar_gkl690_1.pdf]
